1 **Age related clustering in global COVID-19 infection fatality ratios and death**

2 **trajectories**

3 Thu-Lan Kelly<sup>1,2\*</sup>, Caroline Miller<sup>1,3</sup>, Jacqueline A Bowden<sup>3,1</sup>, Joanne Dono<sup>1</sup>, Paddy A

4 Phillips<sup>4</sup>

5

6 <sup>1</sup>South Australian Health and Medical Research Institute, South Australia, Australia

7 <sup>2</sup>University of South Australia, Clinical and Health Sciences, South Australia, Australia

8 <sup>3</sup>University of Adelaide, School of Public Health, South Australia, Australia

9 <sup>4</sup>SA Commission on Excellence and Innovation in Health, South Australia, Australia

10

11 \*Corresponding author

12 E-mail: [Lan.Kelly@sahmri.com](mailto:Lan.Kelly@sahmri.com) (TLK)

13

## 14 **Abstract**

## 15 **Background**

16 An accurate measure of the impact of COVID-19 is the infection fatality ratio, or the  
17 proportion of deaths among those infected, which is independent of variable testing rates  
18 between nations. The risk of mortality from COVID-19 depends strongly on age and current  
19 single estimates of the infection fatality ratio do not account for differences in national age  
20 profiles. In addition, it is unclear whether age influences cumulative death trajectories, or if  
21 differences between regions are because of the effect and timing of public health  
22 interventions.

23 Our objective is to determine whether (1) infection fatality ratios and (2) death trajectories are  
24 clustered into more than one group due to differences in national age profiles.

## 25 **Methods**

26 National age standardised infection fatality ratios were derived from age stratified estimates  
27 from China and population estimates from the World Health Organisation. The infection  
28 fatality ratios were clustered into groups using Gaussian mixture models. Trajectory analysis  
29 clustered cumulative death rates at two time points, 50 and 150 days after the first reported  
30 death.

## 31 **Findings**

32 Infection fatality ratios from 201 nations were clustered into three groups: young, middle and  
33 older, with corresponding means (SD) of 0.20% (0.03%), 0.38% (0.11%) and 0.93% (0.21%).

34 At 50 and 150 days, there were two and three clusters, respectively, of cumulative death  
35 trajectories from 122 nations with at least 25 deaths reported at 100 days. The first cluster had  
36 steadily increasing or stable cumulative death rates, while the second and third clusters had  
37 moderate and fast increases in rates, respectively. Fifty-eight nations changed cluster group  
38 membership between time points. There was an association between the infection fatality  
39 ratio clusters and the change in trajectory clusters between 50 and 150 days ( $p=0.014$ ).

## 40 **Conclusion**

41 Differences in national age profiles created three clusters in the COVID-19 infection fatality  
42 ratio, with the impact on younger nations less than the current estimate 0.5-1.0%. National  
43 cumulative death rates were clustered into steady, moderate or fast trajectories. Changes in  
44 death rate trajectories between 50 and 150 days were associated with the infection fatality  
45 ratio clusters, however evidence for the influence of age on death trajectories is mixed.

## 46 **Introduction**

47 The disease COVID-19 caused by the coronavirus SARS-CoV-2 was first described in  
48 Wuhan, China in December 2019 [1-2]. The impact the disease will have on the global  
49 population has been estimated through the case fatality rate (CFR), or the proportion of  
50 deaths among confirmed cases. Since the number of cases depends on testing rates which  
51 may include only symptomatic or severe cases, the CFR may be an over-estimate of the  
52 impact of the disease.

53 In contrast, the infection fatality ratio (IFR) is the proportion of deaths among infected  
54 individuals and is a more accurate estimate of disease mortality. However, it is difficult to  
55 determine the true number of infections in a population. Recent antibody prevalence studies  
56 have attempted to establish infection rates in the USA, Spain and elsewhere [3-5].

57 Studies have shown that the risk of death from COVID-19 depends strongly on age [6-10]. A  
58 recent meta-analysis calculated an IFR of 0.68 % (95% CI 0.53-0.82%), but with significant  
59 heterogeneity between regions [6]. The authors concluded that different regions may  
60 experience different IFRs due to age structure and underlying co-morbidities and called for  
61 more research on age stratified IFRs. A further meta-analysis on the age specificity of  
62 COVID-19 IFRs [7] confirmed the exponential dependence of mortality on age also found in  
63 studies from China [8] and Italy [9]. Overall IFRs varied from 0.66% (95% credible interval  
64 0.39-1.33%) in China to 1.29 % (95% crI 0.89-2.01%) in Italy, because Italy has an older  
65 population than China. Differences in age structure and age specific prevalence were found to  
66 account for up to 90% of the geographic variation in population IFR [7] and an IFR of below  
67 0.5% was ruled out in populations with more than 30% over 60 years old [9]. Due to this  
68 strong age dependence, the US Centre for Disease Control and Prevention now publishes age-  
69 specific estimates of IFR [10].

70 The IFR summarises the expected mortality risk in a population at a single point in time. In  
71 addition to the IFR, the rate at which the disease spreads throughout a population and the  
72 death rate also has a significant impact on health resources. While age is a significant risk  
73 factor for mortality, the spread of infection also depends on public health interventions such  
74 as physical distancing measures, mask wearing, testing, contact tracing, quarantine and  
75 border controls [11]. It is unclear what effect age has on increases in COVID-19 death rates  
76 over time. Clustering groups of countries with similar cumulative death rate trajectories at  
77 different time points enables comparisons of the timing and effectiveness of mitigation  
78 strategies. Comparisons of death trajectory clusters with and without adjusting for differences  
79 in national age profiles may inform whether age influences the spread of the disease  
80 throughout a population.

81

## 82 **Methods**

83 Age standardisation of IFRs estimated from China by Verity et al [8] was performed using a  
84 weighting method (see Supporting Material). The overall estimate of the IFR from China  
85 (0.66% [8]) was multiplied by each nation's weight to obtain a point estimate of the age  
86 adjusted IFR.

87 Model based clustering with Gaussian mixture models was used to cluster groups of nations  
88 with IFRs arising from the same normal distribution, using the 'mclust' R package version  
89 5.4.6 [12]. Estimates of the mean IFR, SD and bootstrapped 95% confidence intervals of the  
90 mean were determined for each distribution.

91 To investigate factors related to death rates that are independent of national age profiles, such  
92 as public health interventions, the next stage was to analyse death rate trajectories. If

93 infection rates are assumed to be equal across groups and age stratified IFRs relative to those  
94 in the 80+ age group are assumed to be the same for every nation, then the IFR weights can  
95 be used to age standardise death rates per population. The age stratified IFRs in China [8] are  
96 broadly in agreement with those estimated by a meta-analysis [7] and in Italy [9] (S1 Table in  
97 the Supporting Material). To remove any potential effect of age on the death trajectories,  
98 cumulative death rates were weighted. Trajectory analysis of cumulative death rates per  
99 population was used at two time points: 50 and 150 days after the first reported death from  
100 COVID-19. Since trajectory analysis is sensitive to outliers in the data [13], to ensure stable  
101 trajectories, only countries with at least 25 deaths reported by 100 days after the first death  
102 were included in the analysis. Rolling 14-day averages of weighted cumulative deaths rates  
103 were smoothed using splines to reduce the effect of outlying data points. The R package ‘traj’  
104 version 1.2, which combines principal components of statistical measures of growth and  
105 cluster analysis, was used to cluster cumulative death rate trajectories into groups, without  
106 requiring the number of clusters to be determined a priori [13]. A sensitivity analysis was also  
107 conducted using unweighted trajectories.

108 To test whether age may be associated with death rate trajectories, Fisher’s exact test was  
109 used to test for differences in the IFR cluster group membership and any change in trajectory  
110 group membership between the two time points.

111 The R package ‘rworldmap’ version 1.3-6 [14] was used to visualise the IFR and trajectory  
112 clusters on a global scale. R software version 4.0.2 (R foundation for Statistical Computing,  
113 Vienna, Austria) was used for all analyses.

114

## 115 **Data**

116 Estimates of national populations in 2020 by five-year age groups from the World Health  
117 Organisation were available from [15]. Daily cumulative death rates compiled by the  
118 European Centre for Disease Control were obtained from the Our World in Data website  
119 [16]. All datasets and R code used to produce the results are available from  
120 <https://github.com/lan-k/COVID19>.

121

## 122 **Results**

123 Age adjusted IFRs were calculated for 201 countries. If the national IFRs were assumed to be  
124 from one normal distribution, the mean IFR would be 0.54% (SD 0.34%); however, a  
125 histogram of the estimated IFRs showed that these may not be represented by a single normal  
126 distribution (Fig 1).

127 **Figure 1:** Histogram of global IFR estimates

128

129 Clustering of the IFRs produced three groups of nations with young, middle and older age  
130 profiles. Model fit diagnostics can be found in the Supporting Material (S1 and S2 Figs).  
131 Mean IFRs (SD) from the three distributions are 0.20% (0.03%), 0.38% (0.11%) and 0.93%  
132 (0.21%) (Table 1). Bootstrapped 95% CIs for the mean and SD of the three normal  
133 distributions and the minimum and maximum IFR in each cluster are also presented in Table  
134 1. The countries included in each cluster are displayed in Fig 2. After excluding countries in  
135 the ‘Young’ cluster, the mean IFR (95% CI) from the remaining countries, assuming the data  
136 were from a single normal distribution, was 0.67% (0.62-0.72%), which is very close to the  
137 meta-analysis estimate in middle aged and older nations of 0.68% (95% CI 0.53-0.82%) [6].

138 **Table 1: Characteristics of the three IFR clusters.**

139

| <b>Cluster (N)</b> | <b>Mean IFR (%)<br/>(95% CI)</b> | <b>SD of<br/>distribution (%)<br/>(95% CI)</b> | <b>IFR range (%)<br/>(min, max)</b> |
|--------------------|----------------------------------|------------------------------------------------|-------------------------------------|
| Young (55)         | 0.20 (0.18-0.23)                 | 0.03 (0.02-0.05)                               | (0.14-0.25)                         |
| Middle (75)        | 0.38 (0.30-0.48)                 | 0.11 (0.05-0.15)                               | (0.25-0.61)                         |
| Older (71)         | 0.93 (0.78-1.03)                 | 0.21 (0.13-0.28)                               | (0.62-1.51)                         |

140

141 **Figure 2: National membership of three IFR clusters.** Countries with missing data are  
142 shown in white.

143 For the trajectory analysis, cumulative death rates were available for 122 countries with at  
144 least 25 deaths 100 days after the first reported death, as of October 13, 2020. Trajectory  
145 analysis clustered countries based on the growth of weighted cumulative death rates over  
146 time and the groups are independent of the IFR clusters in Fig 2. Two and three clusters were  
147 found at 50 and 150 days, respectively; ‘Steady’, ‘Moderate’ and a third cluster ‘Fast’ at 150  
148 days (Table 2). Cluster group membership was based on the shape of the trajectory rather  
149 than the value of cumulative death rates at the end of the period. The first cluster, ‘Steady’,  
150 had cumulative death rates which had plateaued or slowly increased towards the end of the  
151 time window, while the second and third clusters, ‘Moderate’ and ‘Fast’, showed death rates  
152 which were moderately or rapidly increasing, respectively. Details of the statistical measures  
153 which defined the clusters at each time window and diagnostics can be found in S2 Table and  
154 S3 and S4 Figs in the Supporting Material. The median trajectories and interquartile ranges  
155 for each group at 50 and 150 days after the first reported death are shown in Fig 3. Since  
156 clusters were defined by the shape of the trajectories, cluster group membership did not



157 change in a sensitivity analysis using unweighted trajectories. Fig 4 shows national group  
158 membership of the trajectory clusters at 50 and 150 days after the first reported death.

159

160 **Table 2: Median cumulative death rate and interquartile range for clusters at 50 and**  
161 **150 days after the first reported death.**

| <b>Cluster</b> | <b>50 days<br/>(N)</b> | <b>150 days<br/>(N)</b> | <b>Median cumulative<br/>death rate at 50 days<br/>(IQR) (per 100k)</b> | <b>Median cumulative<br/>death rate at 150 days<br/>(IQR) (per 100k)</b> |
|----------------|------------------------|-------------------------|-------------------------------------------------------------------------|--------------------------------------------------------------------------|
| Steady         | 75                     | 61                      | 8.63 (4.10-18.0)                                                        | 30.3 (12.3-55.0)                                                         |
| Moderate       | 47                     | 38                      | 18.2 (3.9-48.0)                                                         | 70.6 (37.3-189)                                                          |
| Fast           | -                      | 23                      | -                                                                       | 372 (295-492)                                                            |

162

163 **Figure 3: Median cluster trajectories.** Median trajectories (solid line) and interquartile  
164 range (dashed line) for the ‘Steady’ (blue), ‘Moderate’ (orange) and ‘Fast’ (red) clusters at  
165 (A) 50 days and (B) 150 days after the first reported death.

166

167 **Figure 4: National trajectory cluster group membership.** Cluster group membership of the  
168 ‘Steady’ (blue), ‘Moderate’ (orange) and ‘Fast’ (red) clusters at (A) 50 days and (B) 150 days  
169 after the first reported death. Countries excluded from the analysis are shown in white.

170

171 Between the two time points, 58 out of 122 nations (48%) changed cluster group membership  
172 (Fig 5). Forty-four countries in the ‘Worse’ group moved to faster death trajectories, either  
173 from ‘Steady’ at 50 days to ‘Moderate’ or ‘Fast’ at 150 days; or from ‘Moderate’ at 50 days

174 to ‘Fast’ at 150 days. There were 14 countries in the ‘Improved’ group which changed from  
175 ‘Moderate’ at 50 days to ‘Steady’ at 150 days.

176

177 **Figure 5: Change in trajectory cluster group membership over time.** Change in group  
178 membership of trajectory clusters between 50 and 150 days after the first reported death. The  
179 ‘Steady’ (blue) and ‘Moderate’ (orange) groups remained unchanged between time points.  
180 Between 50 and 150 days, ‘Improved’ (green) changed from ‘Moderate to ‘Steady’, while  
181 ‘Worse’ (red) increased death rates to ‘Moderate’ or ‘Fast’.

182

183 Despite the trajectory clusters remaining unchanged between the weighted and unweighted  
184 analyses, there was evidence of an association between the IFR clusters and the change in  
185 cluster group membership of the death rate trajectories (Table 5,  $p=0.014$ ). Middle aged  
186 countries were more likely to be ‘Worse’ between 50 and 150 days, while older nations were  
187 more likely to be ‘Steady’. Young nations showed mixed patterns of change; they were just  
188 as likely to be ‘Moderate’ as ‘Improved’, or ‘Steady’ as ‘Worse’. Compared with Table 2,  
189 there were 20/55 (36%) young, 39/75 (52%) middle and 4/71 (6%) older nations which were  
190 excluded due to low numbers of reported deaths at 100 days.

191

192 **Table 5: Association between the IFR clusters and the change in trajectory membership**  
193 **between 50 and 150 days.** Cells show N and row % for 122 nations. Row percentages may  
194 not add to 100% due to rounding. P-value from Fisher’s exact test.

|             | Trajectory Change between 50 and 150 days |          |          |       | p=0.014   |
|-------------|-------------------------------------------|----------|----------|-------|-----------|
| IFR cluster | Steady                                    | Moderate | Improved | Worse | Row Total |

|        |          |         |         |          |    |
|--------|----------|---------|---------|----------|----|
| Young  | 14 (40%) | 4 (11%) | 4 (11%) | 13 (37%) | 35 |
| Middle | 8 (22%)  | 8 (22%) | 1 (3%)  | 19 (53%) | 36 |
| Older  | 25 (49%) | 5 (10%) | 9 (18%) | 12 (24%) | 51 |

195

## 196 **Discussion**

197 The risk of death from COVID-19 is highly dependent on age. Current estimates of the IFR  
198 are between 0.5-1.3%, are difficult to calculate and assume a single value will describe the  
199 global impact of the disease. There have been few studies reporting IFRs for younger nations  
200 such as in Africa, possibly due to difficulties in testing, measuring the number of  
201 asymptomatic infections and reporting accurate death rates. It has been suggested the  
202 different regions will experience different IFRs due to age structure and co-morbidities [6,  
203 17-18]. A single estimate of the IFR for all nations may not capture the true global  
204 distribution. Other studies have predicted COVID-19 IFRs are reduced in low to middle  
205 income countries, even after adjusting for limited health system capacity [18-19]. Conversely,  
206 older nations experience higher IFRs, even those with more advanced health systems.

207 Our study has shown that national IFRs estimated using direct age standardisation of Chinese  
208 data are not drawn from a single normal distribution, but from a mixture of three distributions  
209 with different means and standard deviations. This would explain some of the heterogeneity  
210 in the IFRs reported [6]. When countries from the ‘Young’ cluster were excluded, the mean  
211 of the remaining national IFRs, assuming a single normal distribution, is very close to the  
212 meta-analysis estimate in middle aged and older nations. If data from younger countries  
213 become available, they may confirm our findings. While younger nations may have lower age  
214 standardised IFRs, these countries may have less developed health systems and poorer health

215 status, so the actual infection fatality ratio in these nations may be higher than that estimated  
216 due to age alone [18].

217 While mortality risk increases exponentially with age, other factors may influence the spread  
218 of the disease and death rates over time. Trajectory analysis clustered nations depending on  
219 the growth in death rates at 50 and 150 days after the first reported death. At 50 days, North  
220 America, most of Europe and Asia, parts of Central and South America and Australia were  
221 experiencing moderately increasing death rates. By 150 days, parts of South-East Asia,  
222 Eastern Europe and Australia (the ‘Improved’ group in Fig 5) had stabilised their death  
223 trajectories through public health interventions such as lockdowns, increasing testing rates,  
224 mask wearing, contact tracing and border controls. In contrast, there were accelerating death  
225 rates in the USA, parts of Central and South America, the Middle East and Africa at 150 days  
226 (the ‘Worse’ group), while the ‘Moderate’ group included regions in South and East Asia,  
227 North Africa, Canada, Argentina and Russia which had not slowed their trajectories. The time  
228 window at 150 days may indicate that some nations were experiencing subsequent waves of  
229 infections due to the easing of restrictions or other factors, including those who had  
230 successfully suppressed the disease previously.

231 We found mixed evidence for the influence of age on death rate trajectories. The trajectory  
232 clusters were the same in the weighted and unweighted analyses at both time points and each  
233 trajectory cluster included a mixture of young, middle and older nations from the IFR  
234 clusters. However, we found an association between the IFR clusters and a change in the  
235 trajectory cluster group membership between 50 and 150 days. The young and middle aged  
236 IFR clusters are very similar to the low- and middle-income nations discussed in Walker et al  
237 [19], so this apparent association may be due to other factors. For example, low income  
238 (younger) nations acted earlier with suppression strategies due to limited health system  
239 capacity [19] and nations which successfully suppressed the disease had too few deaths to

240 appear in the trajectory analysis. Apart from relatively immutable risk factors in a population,  
241 such as gender and co-morbidities [17-19], implementation of public health measures can  
242 make an important difference to the increase in deaths. Further investigation is required to  
243 determine the effect of age on death rate trajectories.

244 In addition to age, mortality also depends on gender, co-morbidities, ethnicity, obesity and  
245 other risk factors such as smoking [20-21], as well as access to health services. Increased risk  
246 of severe COVID-19 requiring hospitalisation due to underlying health conditions has been  
247 calculated at the national level [17]. As an extension to our analysis, the risk models  
248 developed for infection hospitalisation ratios by Clark et al [17] could be adapted to the age  
249 standardised national IFR point estimates before clustering. However, Levin et al [7] found  
250 that age profiles and age-related prevalence accounted for up to 90% of geographic variation  
251 in national IFRs.

252 Our study has some limitations. Age stratified IFRs relative to the 80+ age group may differ  
253 from those in China or Italy, particularly in countries where health system support is limited,  
254 overwhelmed or inequitable. The assumption that infection rates are equal across age groups  
255 may be met only in nations with large outbreaks and high death rates or with high inter-  
256 generational mixing [19, 22-23]. However, cluster group membership in the trajectory  
257 analysis did not depend on weighting for age adjustment. COVID-19 mortality data may be  
258 under-reported and the calculated IFRs may be under-estimates or lower bounds [18].

259 Conversely, mortality from COVID-19 may reduce throughout the pandemic as more  
260 effective treatments for the disease are discovered [24] and the calculated IFRs may become  
261 upper bounds. The IFR estimates were produced from data that was available in February  
262 2020, before large scale seroprevalence studies had been conducted [3-6]. If more up to date  
263 age stratified IFR estimates become available, the analysis can be updated. The spread of  
264 disease through a population may also depend on international mobility, climate or regional

265 susceptibility [25]. Finally, the association between the IFR clusters and the change in death  
266 rate trajectories between time points may be biased by socioeconomic factors or missing  
267 death rate trajectories in countries excluded due to low numbers of reported deaths.

268

## 269 **Conclusion**

270 Age standardised COVID-19 IFRs were clustered into three groups depending on national  
271 age profiles. A cluster of younger nations, predominantly in Africa, had a lower mean IFR  
272 than older nations. However, these countries may have less developed health systems and  
273 poorer overall health status, so the actual IFR in these nations may be higher than that  
274 estimated from age alone. The change in death rate trajectories over time was associated with  
275 age but may also be due in part to other factors such as public health interventions.

276 It is important to consider the national age structure in planning for the impact of COVID-19  
277 on overall mortality, however public health interventions are important in reducing the spread  
278 of the disease and hence death rates in a population over time.

279

## 280 **References**

- 281 1. Zhu N, Zhang D, Wang W, et al; China Novel Coronavirus Investigating and Research  
282 Team. A novel coronavirus from patients with pneumonia in China, 2019. *N Engl J*  
283 *Med.* 2020;382(8):727-733. doi:[10.1056/NEJMoa2001017](https://doi.org/10.1056/NEJMoa2001017)
- 284 2. Novel Coronavirus Pneumonia Emergency Response Epidemiology Team. Vital  
285 surveillances: the epidemiological characteristics of an outbreak of 2019 novel  
286 coronavirus diseases (COVID-19)—China, 2020. *China CDC Weekly.* 2020;2(8):113-

- 287 122. Accessed April 16, 2020. <http://weekly.chinacdc.cn/en/article/id/e53946e2-c6c4->  
288 [41e9-9a9b-fea8db1a8f51](http://weekly.chinacdc.cn/en/article/id/e53946e2-c6c4-41e9-9a9b-fea8db1a8f51)
- 289 3. Havers FP, Reed C, Lim T, et al. Seroprevalence of Antibodies to SARS-CoV-2 in 10  
290 Sites in the United States, March 23-May 12, 2020. JAMA Intern Med. Published online  
291 July 21, 2020. doi:10.1001/jamainternmed.2020.4130
- 292 4. Pollán M, Pérez-Gómez B, Pastor-Barriuso R, Oteo J, Hernán MA, Pérez-Olmeda M, et  
293 al. Prevalence of SARS-CoV-2 in Spain (ENE-COVID): a nationwide, population-based  
294 seroepidemiological study. Lancet 2020; published online July 6.  
295 [http://dx.doi.org/10.1016/S0140-6736\(20\)31483-5](http://dx.doi.org/10.1016/S0140-6736(20)31483-5).
- 296 5. Stringhini S, Wisniak A, Piumatti G, Azman AS, Lauer SA, Baysson H, et al.  
297 Seroprevalence of anti-SARS-CoV-2 IgG antibodies in Geneva, Switzerland  
298 (SEROCoV-POP): a population-based study. Lancet 2020; published online June 11.  
299 [http://dx.doi.org/10.1016/S0140-6736\(20\)31304-0](http://dx.doi.org/10.1016/S0140-6736(20)31304-0)
- 300 6. Meyerowitz-Katz G, Merone L, A systematic review and meta-analysis of published  
301 research data on COVID-19 infection-fatality rates. International Journal of Infectious  
302 Diseases 2020; published online, September 29.  
303 <https://doi.org/10.1016/j.ijid.2020.09.1464>
- 304 7. Levin AT, Hanage WP, Owusu\_Boaitey N, et al. Assessing the Age Specificity of  
305 Infection Fatality Rates for COVID-19: Systematic Review, Meta-Analysis, and Public  
306 Policy Implications. Preprint published online October 8, 2020. Available at  
307 <https://doi.org/10.1101/2020.07.23.20160895>
- 308 8. Verity R, Okell LC, Dorigatti I, et al. Estimates of the severity of coronavirus disease  
309 2019: a model-based analysis. Lancet Infect Dis. Published online March 30, 2020.  
310 DOI:[https://doi.org/10.1016/S1473-3099\(20\)30243-7](https://doi.org/10.1016/S1473-3099(20)30243-7)

- 311 9. Paradisi M, Rinaldi G. An empirical estimate of the infection fatality rate of COVID-19  
312 from the first Italian outbreak. Preprint published online May 18, 2020. Available at  
313 <http://dx.doi.org/10.2139/ssrn.3582811>
- 314 10. Centers for Disease Control and Prevention. COVID-19 Pandemic Planning Scenarios.  
315 Published September 10, 2020. [https://www.cdc.gov/coronavirus/2019-  
316 ncov/hcp/planning-scenarios.html](https://www.cdc.gov/coronavirus/2019-ncov/hcp/planning-scenarios.html)
- 317 11. Ferguson NM, Laydon D, Nedjati-Gilani G, Imai N, Ainslie K, Baguelin M, et al.  
318 Impact of non-pharmaceutical interventions (NPIs) to reduce COVID-19 mortality and  
319 healthcare demand. Imperial College London. Published online 16 March, 2020. doi:  
320 <https://doi.org/10.25561/77482>
- 321 12. Scrucca L, Fop M, Murphy TB and Raftery AE. mclust 5: clustering, classification and  
322 density estimation using Gaussian finite mixture models. The R Journal 2016; 8(1):289-  
323 317 <https://doi.org/10.32614/RJ-2016-021>
- 324 13. Sylvestre MP, McCusker J, Cole M, Regeasse. Classification of patterns of delirium  
325 severity scores over time in an elderly population. International Psychogeriatrics, 2006;  
326 18(4):667-680. doi:10.1017/S1041610206003334.
- 327 14. South, A. rworldmap: A New R package for Mapping Global Data. The R Journal 2011;  
328 3(1):35-43.
- 329 15. WHO World Population Prospects 2020 estimates. Accessed April 6, 2020.  
330 <https://population.un.org/wpp/Download/Standard/Population/>
- 331 16. Our World in Data, <https://covid.ourworldindata.org/data/owid-covid-data.csv>, extracted  
332 on October 13, 2020.
- 333 17. Clark A, Jit M, Warren-Gash C, Guthrie B, Wang HHX, Mercer SW, et al. Global,  
334 regional, and national estimates of the population at increased risk of severe COVID-19



- 335 due to underlying health conditions in 2020: a modelling study. *Lancet Glob Health*  
336 2020; published online June 12. [http://dx.doi.org/10.1016/S2214-109X\(20\)30264-3](http://dx.doi.org/10.1016/S2214-109X(20)30264-3).
- 337 18. Ghisolfi S, Almås I, Sandefur JC, et al. Predicted COVID-19 fatality rates based on age,  
338 sex, comorbidities and health system capacity. *BMJ Global Health* 2020;5:e003094.  
339 doi:10.1136/bmjgh-2020-003094
- 340 19. Walker PGT, Whittaker C, Watson OJ, et al. The impact of COVID-19 and strategies  
341 for mitigation and suppression in low- and middle-income countries. *Science* 2020; 369  
342 (6502); 413–422 DOI: 10.1126/science.abc0035
- 343 20. Yang J, Zheng Y, Gou X, Pu K, Chen Z, Guo Q, et al. Prevalence of comorbidities and  
344 its effects in coronavirus disease 2019 patients: A systematic review and meta-analysis.  
345 *Int J Infect Dis.* 2020;94:91–95. doi:10.1016/j.ijid.2020.03.017
- 346 21. Richardson S, Hirsch JS, Narasimhan M, Crawford JM, McGinn T, Davidson KW, et al.  
347 Presenting Characteristics, Comorbidities, and Outcomes Among 5700 Patients  
348 Hospitalized With COVID-19 in the New York City Area. *JAMA*. Published online  
349 April 22, 2020. doi:10.1001/jama.2020.6775
- 350 22. Dowd J, Andriano L, Brazel DM, Rotondi V, Block P, Ding X, et al. Demographic  
351 science aids in understanding the spread and fatality rates of COVID-19. *Proceedings of*  
352 *the National Academy of Sciences.* 2020; 117 (18): 9696-9698; DOI:  
353 10.1073/pnas.2004911117
- 354 23. Esteve A, Permanyer I, Boertien, Vaupel JW. National age and coresidence patterns  
355 shape COVID-19 vulnerability. *Proceedings of the National Academy of Sciences.*  
356 2020; 117 (28) 16118-16120; DOI: 10.1073/pnas.2008764117
- 357 24. RECOVERY Collaborative Group, Horby P, Lim WS, Emberson JR, Mafham M, Bell  
358 JL, et al. Dexamethasone in hospitalized patients with COVID-19 - preliminary report.  
359 *N Engl J Med.* 2020. <https://doi.org/10.1056/NEJMoa2021436>

- 360 25. Kubota Y, Shiono T, Kusumoto B, Fujinuma J. Multiple drivers of the COVID-19  
361 spread: The roles of climate, international mobility, and region-specific conditions.  
362 PLOS ONE 2020. Published online September 23.  
363 <https://doi.org/10.1371/journal.pone.0239385>  
364  
365  
366

## 367 **Supporting information captions**

368 **S1 Table: Comparison of global age specific and relative IFRs.** Confidence limits for  
369 IFR/IFR 80+ were estimated using the upper and lower limits for IFR and dividing by the  
370 point estimate for IFR 80+ (IFR 81+ for Italy).

371

372 **S1 Figure: Probability density function and histogram.** Probability density function of  
373 fitted distributions from three clusters (solid line) and histogram of observed IFRs.

374

375 **S2 Figure: Model diagnostics.** Quantile-Quantile plots to test normality (left) and estimated  
376 and empirical cumulative density functions (CDF) (right).

377

378 **S2 Table: Statistical measures of trajectory clusters.** Statistical measures selected by  
379 factor analysis to describe the 50 and 150 day trajectories by cluster.

380

381 **S3 Figure: Criteria used to determine optimal number of clusters for 50 day**  
382 **trajectories.** Cubic clustering criterion (ccc) criteria for 2-15 clusters (left) and within groups  
383 sum of squares for 1-15 clusters (right).

384

385 **S4 Figure: Criteria used to determine optimal number of clusters for 150 day**  
386 **trajectories.** Cubic clustering criterion (ccc) criteria for 2-15 clusters (left) and within groups  
387 sum of squares for 1-15 clusters (right).

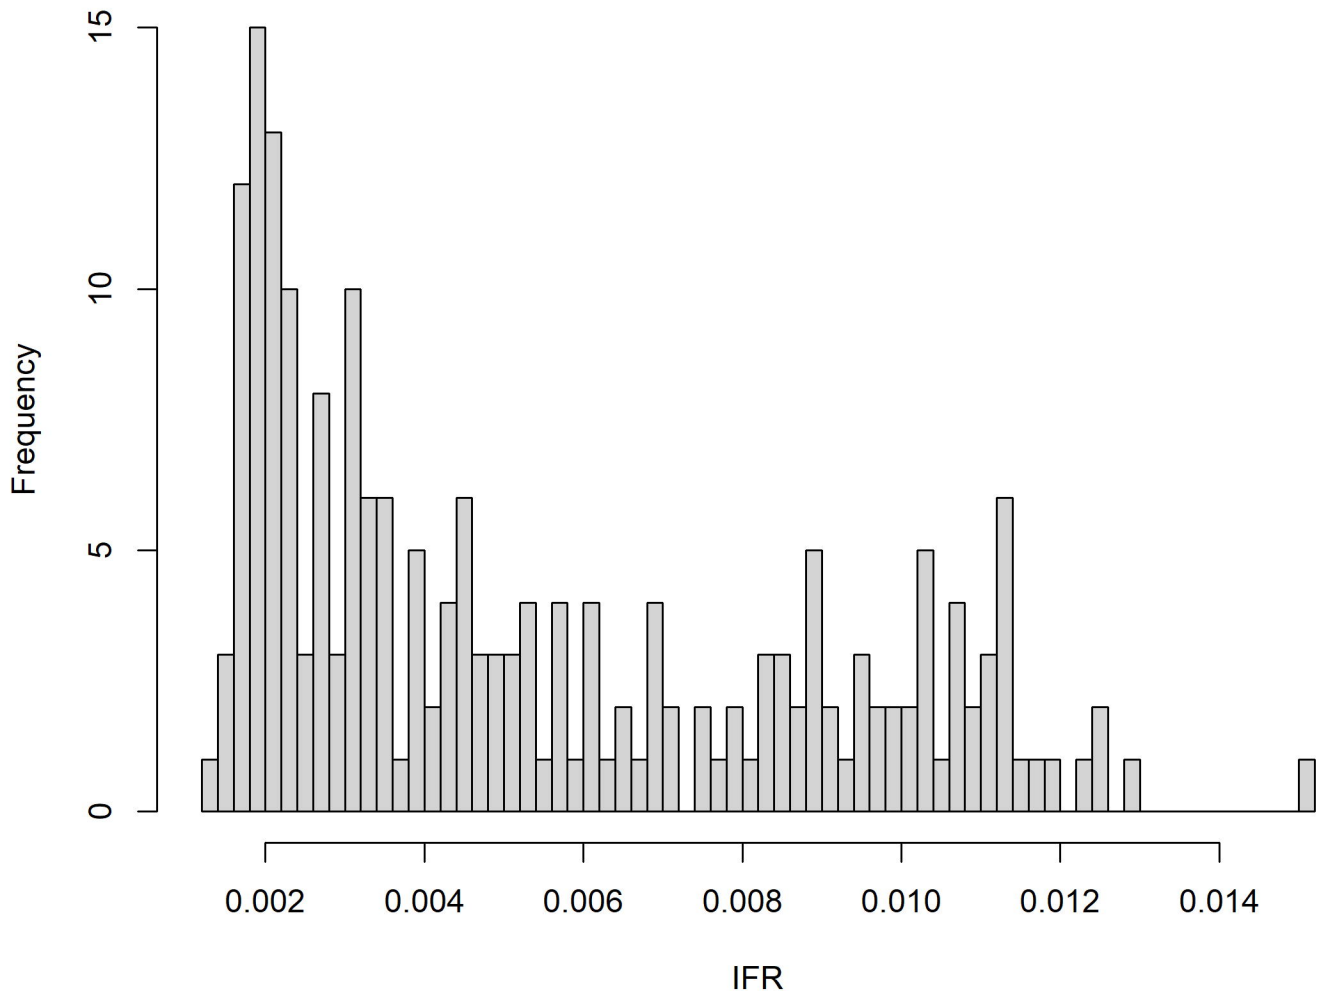

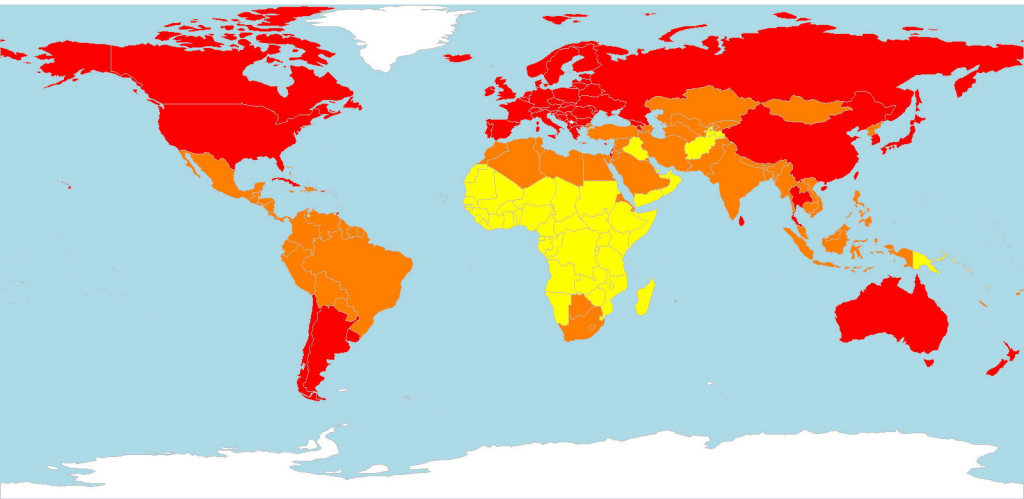

IFR (%) (95% CI)

0.20 (0.18-0.23) 0.38 (0.30-0.49) 0.93 (0.78-1.03)

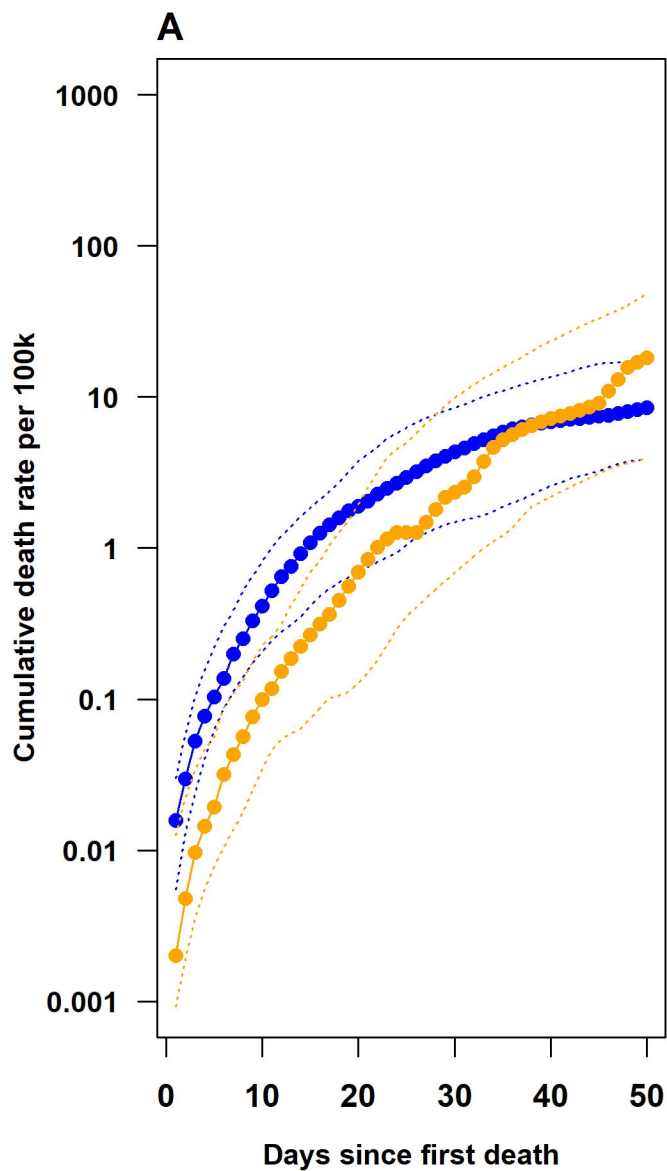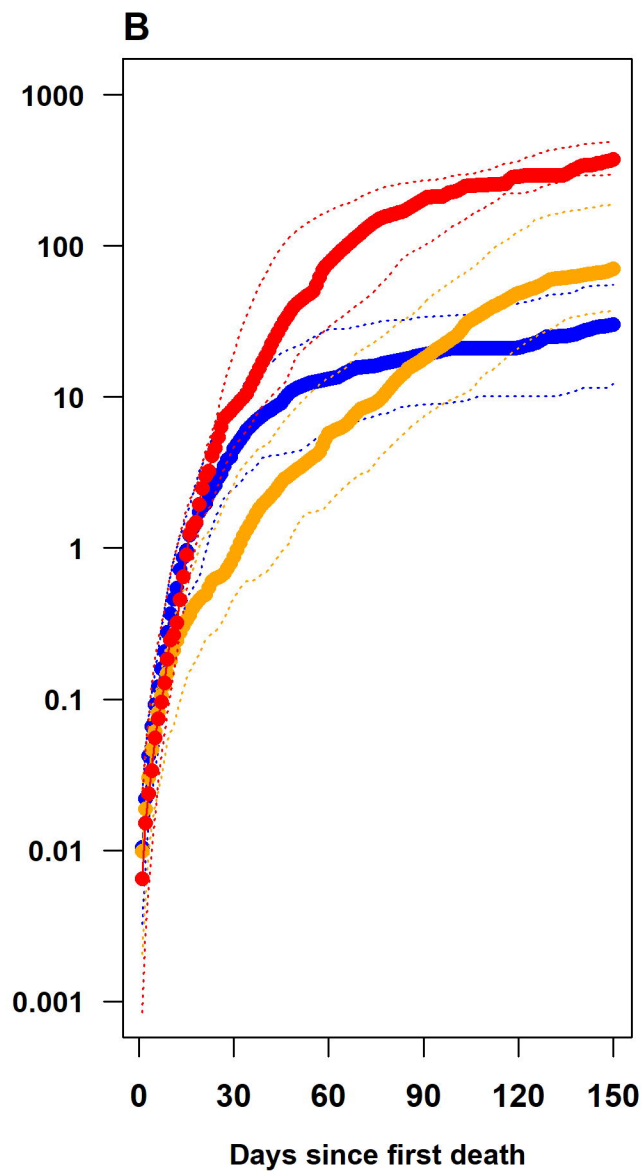

**A**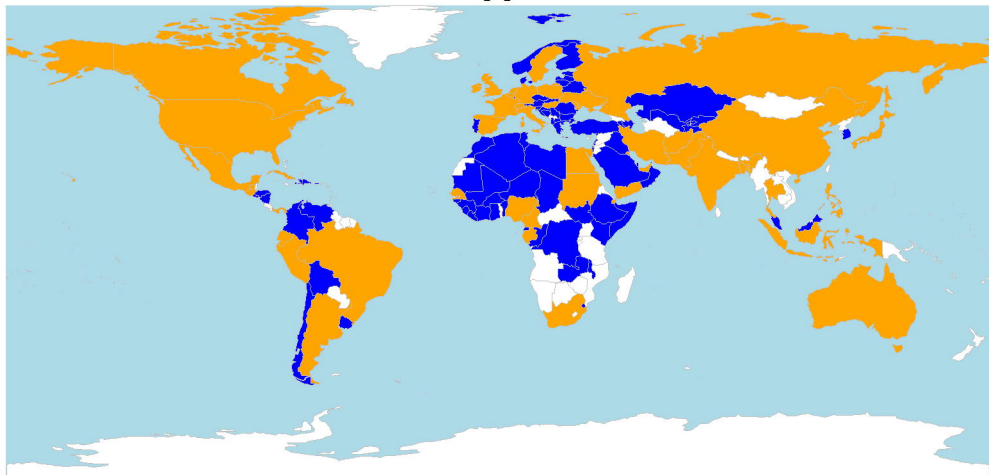**B**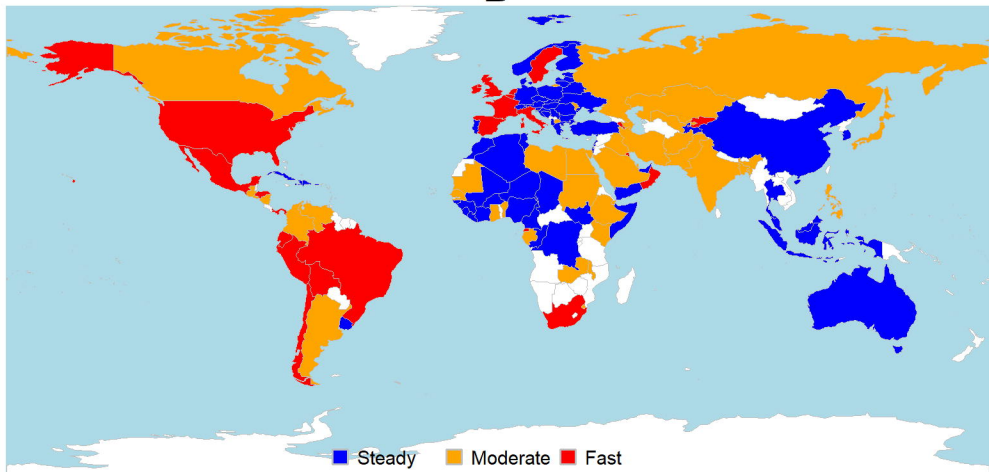

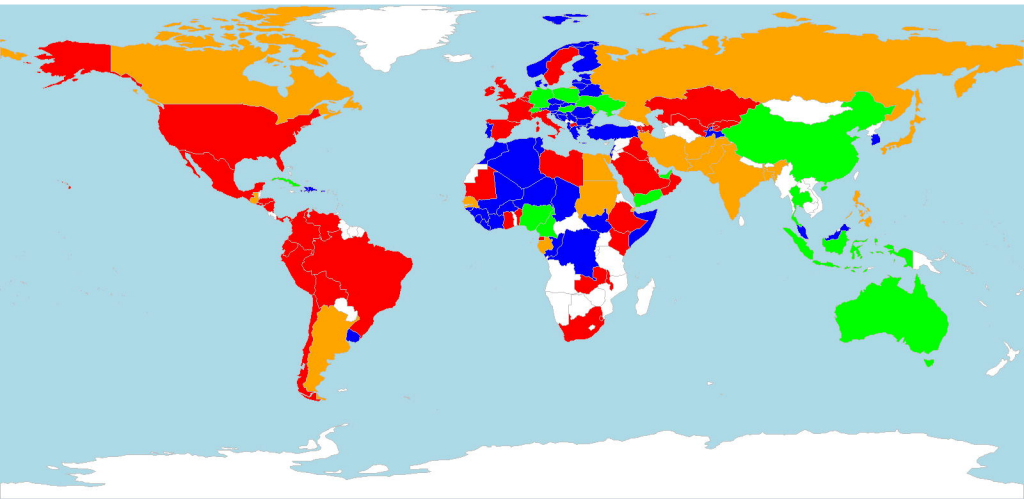

■ Steady   ■ Moderate   ■ Improved   ■ Worse
